## RESEARCH ARTICLE

# Microbiota of newborn calves and their mothers reveals possible transfer routes for newborn calves' gastrointestinal microbiota

Daniela Klein-Jöbstl<sup>1\*</sup>, Narciso M. Quijada<sup>2</sup>, Monika Dzieciol<sup>3</sup>, Benjamin Feldbacher<sup>1,3</sup>, Martin Wagner<sup>3</sup>, Marc Drillich<sup>1</sup>, Stephan Schmitz-Esser<sup>4</sup>, Evelyne Mann<sup>3</sup>

**1** Department for Farm Animals and Veterinary Public Health, Clinical Unit for Herd Health Management, University Clinic for Ruminants, University of Veterinary Medicine Vienna, Vienna, Austria, **2** Laboratory of Molecular Biology and Microbiology, Instituto Tecnológico Agrario de Castilla y León, Valladolid, Spain, **3** Department for Farm Animals and Veterinary Public Health, Institute of Milk Hygiene, Milk Technology and Food Science, University of Veterinary Medicine Vienna, Vienna, Austria, **4** Department of Animal Science, Iowa State University, Ames, Iowa, United States of America

\* [Daniela.Klein@vetmeduni.ac.at](mailto:Daniela.Klein@vetmeduni.ac.at)

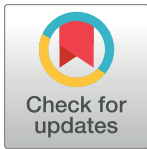

## OPEN ACCESS

**Citation:** Klein-Jöbstl D, Quijada NM, Dzieciol M, Feldbacher B, Wagner M, Drillich M, et al. (2019) Microbiota of newborn calves and their mothers reveals possible transfer routes for newborn calves' gastrointestinal microbiota. PLoS ONE 14 (8): e0220554. <https://doi.org/10.1371/journal.pone.0220554>

**Editor:** Hauke Smidt, Wageningen University, NETHERLANDS

**Received:** December 14, 2018

**Accepted:** July 18, 2019

**Published:** August 1, 2019

**Copyright:** © 2019 Klein-Jöbstl et al. This is an open access article distributed under the terms of the [Creative Commons Attribution License](https://creativecommons.org/licenses/by/4.0/), which permits unrestricted use, distribution, and reproduction in any medium, provided the original author and source are credited.

**Data Availability Statement:** All relevant data are within the paper and its Supporting Information files. The sequencing data now have been made public with all associated data. Data were submitted to the European Nucleotide Archive (ENA) and can be found under the accession number PRJEB29277 (<http://www.ebi.ac.uk/ena/data/view/PRJEB29277>).

**Funding:** The authors received funding from: 1. start-up project (Profillinie 2) by the University of

## Abstract

The intestinal microbiota of newborns plays an important role in the development of immunity and metabolism. In livestock animals, knowledge of the intestinal microbiota is essential not only to prevent diseases but also to optimize weight gain and performance. The aim of our study was to examine faecal samples repeatedly within the first two days of life using 16S rRNA gene High Throughput Sequencing. Additionally, samples from the mouths of the calves and the vaginas, colostrum, and faeces of the dams were included to evaluate possible sources of the calf faecal microbiota. The calf faecal microbiota was highly variable during the first 48 hours *post natum* (*p.n.*). Significant changes were found in species diversity and richness, in copy numbers evaluated by qPCR and in predominant bacteria over time. The most pronounced changes occurred between 6 and 24 hours *p.n.* All calf faecal samples were dominated by Operational Taxonomic Units (OTUs) belonging to the family *Enterobacteriaceae*. Cow faecal samples showed significantly higher species richness, diversity, number of observed OTUs, and copy numbers compared to all other samples. OTUs belonging to the family *Ruminococcaceae* were most abundant in cow faecal and vaginal samples. Colostrum was dominated by *Enhydrobacter* affiliated OTUs. To identify possible inoculation routes for the calf microbiota, we analysed OTU sharing between samples. The calf microbiota during the first two days of life was clearly distinct from the dam's faecal microbiota. Furthermore, colostrum microbiota clearly differed from calf and cow faecal microbiota and thus most likely does not play an important role as inoculation source for calf microbiota during the first two days of life. In contrast, the cow vaginal and the calf faecal microbiota were more similar, suggesting that some of the calf faecal microbiota may derive from inoculation from the birth canal during birth.

Veterinary Medicine Vienna; (no award number available); Recipient Daniela Klein-Jöbstl; 2. Ph.D. studentship from the Spanish National Institute for Agriculture and Food Research and Technology (INIA) cofinanced by the European Social Fund; number: FPI2014-020; Recipient Narciso M. Quijada; and 3. COST action; STSM-FA1202; Recipient Narciso M. Quijada.

**Competing interests:** The authors have declared that no competing interests exist.

## Introduction

Birth exposes the newborn to the vaginal flora of the mother and the environment, setting in motion the bacterial colonisation of the gastrointestinal tract [1]. Up to date, there are few studies available that examined the intestinal and faecal microbiota in newborn calves [2, 3]. Some recent studies have analysed the development of microbial communities in calves from birth to one or up to three weeks of life, weaning and/or to adulthood [2–9]. However, most of these studies have sampled during later stages of calf development and not during the first days or even hours of life [10]. In all studies, microbiota composition varied between sampling time points and sampling sites with significant changes in  $\alpha$ -diversity in gut-related samples over the first weeks of life.

The intestinal microbiota has an important effect on the maturation of the adaptive and innate immune system during early development [11]. Furthermore, the gastrointestinal microbiota has important metabolic and nutritional effects [12]. Consequently, the intestinal microbiota influences the animals' health and performance and has a great impact on the overall welfare [1, 13]. Hence, knowledge of early bacterial colonisation and their possible sources may help to improve calf management during the first days of life.

The aim of our study was to examine the colonisation of the intestinal tract of newborn calves within the first two days of life by analysing faecal samples using High Throughput Sequencing of 16S rRNA gene amplicons. Furthermore, calf mouth samples as well as maternal vaginal, colostrum, and faecal samples were included to evaluate possible sources of the calves' faecal microbiota and to define a core microbiota in these samples.

The hypothesis of the study was that in newborn calves the intestinal tract is colonised by bacteria quickly after birth. According to the literature, we hypothesized that the initial microbiota of the newborn calf is influenced by the microbiota of the birth canal, the dam's faecal microbiota, and the colostrum fed.

## Materials and methods

The study was approved by the institutional ethics and animal welfare committee of the University of Veterinary Medicine, Vienna (ETK-03/05/2015), as well as by the Slovakian Regional Veterinary Food Administration.

## Study design and sampling procedure

Overall, 15 Holstein-Friesian calves and their mothers were included in the study. To reduce environmental, management, and seasonal bias, the study was performed on one commercial dairy farm within two weeks. All animals examined within the study were part of the commercial dairy herd, born and reared on farm. All cows calved in a group calving pen under permanent supervision of a farm worker. The calf was removed from the dam and brought to a clean individual pen immediately after birth. Afterwards the cow was fixed for routine treatment and colostrum harvesting. Colostrum was fed to the calves approximately two hours *p.n.* Only healthy calves delivered vaginally without assistance were enrolled in the study. All animals were sampled by the same experienced veterinarian (DKJ). Samples were taken from the cow's vagina immediately after parturition, when the cow was fixed. The samples were taken by use of a sterile cytobrush (Gynobrush, Heinz Herenz, Hamburg, Germany; 20 mm in length and 7 mm in diameter) as described by Prunner et al. [14]. In short, the cytobrush was screwed on a metal rod of 65 cm length. The brush was protected by a disposable plastic catheter and plastic sleeve. Before sampling the vulva was cleaned with dry paper. The cytobrush was inserted, protected by a hand using a sterile glove. Inside the vagina, the plastic sleeve was retracted and the brush moved forward carefully and rolled along the cervical wall. The brush was drawn back

into the catheter before the instrument was removed from the reproductive tract. Two samples were taken from each cow. The cytobrush was then stored in a sterile tube with 1.5 ml RNAlater solution (ThermoFisher Scientific). Smears from the calf mouth were also taken by cytobrush after the calf was moved to the individual pen (within 0.5 hours *p.n.*), before first colostrum feeding. The cytobrush was inserted into the mouth, rolled over the buccal cavity and afterwards placed in a sterile tube with RNAlater solution. Immediately before first colostrum feeding, 50 ml of colostrum was taken of the bucket fed to the individual calf and stored in a sterile tube. All faecal samples were taken from the rectum by use of a sterile glove and lubricant. A minimum of 1g faeces per sampling time was taken. The dams were sampled once (immediately after parturition and sampling of the vagina), whereas five faecal samples were taken from calves within 0.5 hours (before first colostrum feeding), and at 6, 12, 24 and 48 hours *p.n.* (Fig 1). All samples were immediately frozen at  $-20^{\circ}\text{C}$  on farm and shipped frozen to the laboratory of the University of Veterinary Medicine Vienna for further processing.

### Sample preparation and DNA extraction

The sample collection included colostrum ( $n = 15$ ), calf faeces at five time points ( $n = 74$ ), cow faeces ( $n = 15$ ), calf mouth ( $n = 10$ ) and cow vagina ( $n = 15$ ). In total, these 129 samples and one negative process control were applied to sample preparation and DNA isolation. Sample preparation was applied prior DNA isolation to optimise microbial loads and 16S rRNA gene PCR amplifications. The optimized sample preparation of each sample group was as follows:

Colostrum samples (10 ml each) were centrifuged at  $8,000\times g$  for 5 min at  $4^{\circ}\text{C}$  and the supernatant, including the fat cream layer, was discarded. The obtained pellet was washed thrice in  $1\times\text{PBS}$  (phosphate buffered saline; pH 7.3) and centrifuged again at each step at  $8,000\times g$  for 5 min at  $4^{\circ}\text{C}$ . The obtained pellet was applied to the DNA isolation.

For the smear samples from the calf mouths and cow vaginas, the cells retrieved on the cytobrush, which had been stored in 1.5ml RNAlater solution, were submerged in up to 5 ml of sterile Ringer solution. Samples were vigorously horizontally agitated (5 min) to dislodge cells from the cytobrush by using the MOBIO Vortex adapter tube holder for the vortex. The cells were pelleted by centrifugation at  $12,000\times g$  for 10 min at  $4^{\circ}\text{C}$ . After that, the cytobrush was carefully removed, and the centrifugation step was repeated. The pellet was applied to the DNA extraction.

For cow faeces, a sample preparation protocol was not necessary, and extraction of genomic DNA was performed by using 220mg of thawed, homogenized wet faeces per cow. DNA was extracted from all samples using QIAamp DNA Stool Mini Kit (QIAGEN, Hilden, Germany) following the recommendations of the manufacturer. For calf faeces samples, the DNA yield was increased by pooling multiple extraction eluates. For time point 0.5, 6 and 12h *p.n.*, DNA was extracted in triplicate from 220mg of thawed, homogenized, wet faeces per calf. For time points 24 and 48 hours *p.n.*, DNA was extracted in duplicate. For each calf sample, a total of 600  $\mu\text{l}$  or 400  $\mu\text{l}$  DNA suspension (200  $\mu\text{l}$  from each 220 mg aliquot) was concentrated by ethanol precipitation. The DNA pellet was re-suspended in 100  $\mu\text{l}$  ddH<sub>2</sub>O.

### 16S rRNA gene amplicon sequencing

Extracted DNA samples ( $n = 129$ ) and a negative process control were used for 16S rRNA gene PCRs (V345) using the primers 341F (5' -CCTACGGGSRGCGAGCAG-3') and 909R (5' -TTTCAGYCTTGCGRCCGTAC-3') including the universal 5' tails as specified in the Nextera library protocol from Illumina. The amplicons (approx. 568bp) were sent to Microsynth, Balgach, Switzerland. Libraries were constructed by ligating sequencing adapters and indices onto purified PCR products using the Nextera XT Sample Preparation Kit (Illumina)

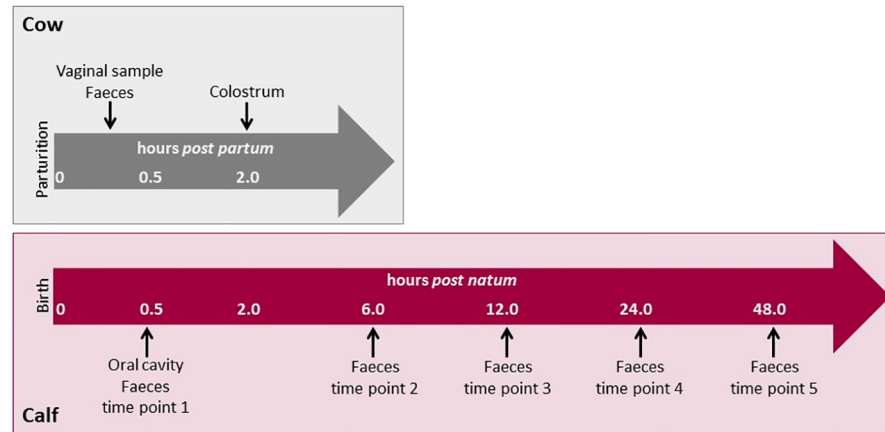

**Fig 1. Overview over samples and sampling time points in regard to parturition and birth in cow-calf pairs.**

<https://doi.org/10.1371/journal.pone.0220554.g001>

according to the recommendations of the manufacturer. Equimolar amounts of each of the libraries were pooled and submitted for sequencing on an Illumina MiSeq platform using a 300 bp read length paired-end protocol.

## Sequence analysis

Quality of 16S rRNA gene amplicons sequences was evaluated by using FASTQC (<http://www.bioinformatics.babraham.ac.uk/projects/fastqc/>). Based on a Phred score below 20 within a 20-bp-long window, reads were trimmed, and reads shorter than 150 bp were discarded by using Prinseq [15]. Paired-end reads were then merged by using FLASH [16]. Chimeric sequences were excluded by using the “gold” database ([https://drive5.com/uchime/uchime\\_download.html](https://drive5.com/uchime/uchime_download.html)), and singletons were excluded. In order to avoid biases due to different sequencing depths, all samples were rarefied to 23,030 reads per sample. Sequences were then analyzed by using QIIME v1.9.1 [17]. Operational taxonomic units (OTUs) defined by a 97% similarity threshold were picked using the UCLUST algorithm [18]. The most abundant sequence in each OTU was chosen as its representative sequence. The RDP naïve classifier [19] was used to assign the taxonomy of the representative sequence of each OTU against the GreenGenes 16S rRNA database [20] by using the `assign_taxonomy.py` script. The number of reads assigned to each OTU was calculated by using the `make_otu_table.py` script. Alpha (Good’s coverage, Chao1, Shannon and Simpson indices) diversity measures and Weighted UniFrac [21] distance matrices were obtained through QIIME. The OTU table filtered at 0.01% abundance was used to generate a bipartite graph by using QIIME (“`make_otu_network.py`”). Cytoscape 3.3.0 was used to visualize OTU networks [22]. Nodes represent either samples or bacterial OTUs. Connections were drawn between OTUs and the samples they belong, with edge weights defined as the number of sequences from each OTU that occurred in each sample.

## Quantitative PCR

For quantification of bacterial 16S rRNA gene copy numbers, standard curves were constructed by using the primer set 341F (5′-CCT ACG GGA GGC AGC AG-3′) and 534R (5′-ATT ACC GCG GCT GCT GG -3′) to amplify serial dilutions of purified PCR products from all sample types as recently described by Metzler-Zebeli et al. [23]. Copy numbers of

standard curves were calculated using the following equation: DNA (molecules/ $\mu\text{L}$ ) =  $[6.02 \times 10^{23} \text{ (molecules/mol)} \times \text{DNA amount (g/ $\mu\text{L}$ )}] / [\text{DNA length (bp)} \times 660 \text{ (g/mol/bp)} \times 10^9 \text{ ng/g}]$ . For the standard template  $4.83 \times 10^9$  copies per ng were calculated.

Real-time quantitative PCR reactions were run in duplicate (final volume of 25  $\mu\text{L}$ ) using MicroAmp 0.2 mL optical tubes sealed with MicroAmp optical 8-cap strips (Applied Biosystems, Foster City, CA, USA). A single amplification reaction consisted of 12.2  $\mu\text{L}$  diethylpyrocarbonate (DEPC)-treated water, 2.5  $\mu\text{L}$  10 $\times$ buffer, 1.5  $\mu\text{L}$  3 mM  $\text{MgCl}_2$  (stock concentration 50mM), 1  $\mu\text{L}$  of each primer (stock concentration 10  $\mu\text{M}$ ), 0.5  $\mu\text{L}$  undiluted EvaGreen fluorescent DNA stain (JenaBioscience, Jena, Germany), 1  $\mu\text{L}$  of dNTP Mix (stock concentration 20 mM, 5 mM of each dATP, dCTP, dGTP and dTTP; ThermoFisher, Vienna, Austria), 0.3  $\mu\text{L}$  of Platinum Taq DNA polymerase (5 U/ $\mu\text{L}$ ; Thermo Fisher Scientific, Vienna, Austria), and 5  $\mu\text{L}$  template (genomic DNA). The quantification of DNA was performed in a Mx3000P qPCR instrument (Stratagene, La Jolla, CA, USA) (software v.4.10) after initial denaturation at 94°C for 2 min, followed by 45 cycles of 94°C for 30 s, 60°C for one min. To determine the specificity of the amplifications, dissociation curves after each reaction were recorded and carried out at 95°C for one min, followed by complete annealing at 60°C for 30 s and a gradual increasing temperature up to 95°C.

The final copy numbers of total bacteria were calculated using the quantitative mean of the copy number per ml or g, including calculation of the DNA volume subjected to qPCR, the volume of extracted DNA, and the weight or volume of the sample subjected to DNA extraction. Additionally, an average of four 16S rRNA gene copies per genome was taken into account when extrapolating the final copy numbers [24].

## Statistical analyses

Differences in relative abundances on phylum and OTU level as well as in species richness and diversity indices and results of qPCR between calf faecal samples of the different sampling time points and other samples (calf mouth, cow vagina, colostrum, and faeces) were examined by paired Wilcoxon test with Benjamini-Hochberg correction. Statistical analysis were performed using SPSS Statistics for Windows (version 24.0; IBM Deutschland GmbH, Ehningen, Germany). The level of significance was set at  $P < 0.05$ .

## Results

Sequencing of the negative process control resulted in 209 reads. After quality filtering, paired-end joining and chimera removal of the raw sequencing data, 5,080,635 reads remained ( $41,081 \pm 14,517$  reads per sample) ranging from 23,030 to 114,596 reads per sample. Eleven samples (five calf faeces, four cow vagina, and two calf mouth samples) did not pass the initial quality control, and thus they were removed from the sequence analysis. Sequences were classified into 11,905 OTUs using a 97% sequence similarity threshold. Of these, 113 OTUs showed an abundance higher than 0.1%, and 9 showed an abundance higher than 1.0%. The most abundant OTU (OTU-1 unclassified *Enterobacteriaceae*) accounted for 23.5% of the reads and was present in all of the 118 samples studied. Twenty-one OTUs, representing 0.44% of all reads, were assigned to *Archaea*.

## Calf faecal microbiota during the first 48 hours of life

Median good's coverage for the five sampling time points varied between 99.2 and 99.6%. Species richness (Chao1), diversity (Shannon and Simpson diversity index), and the number of observed OTUs significantly differed between calf faecal samples of different time points.

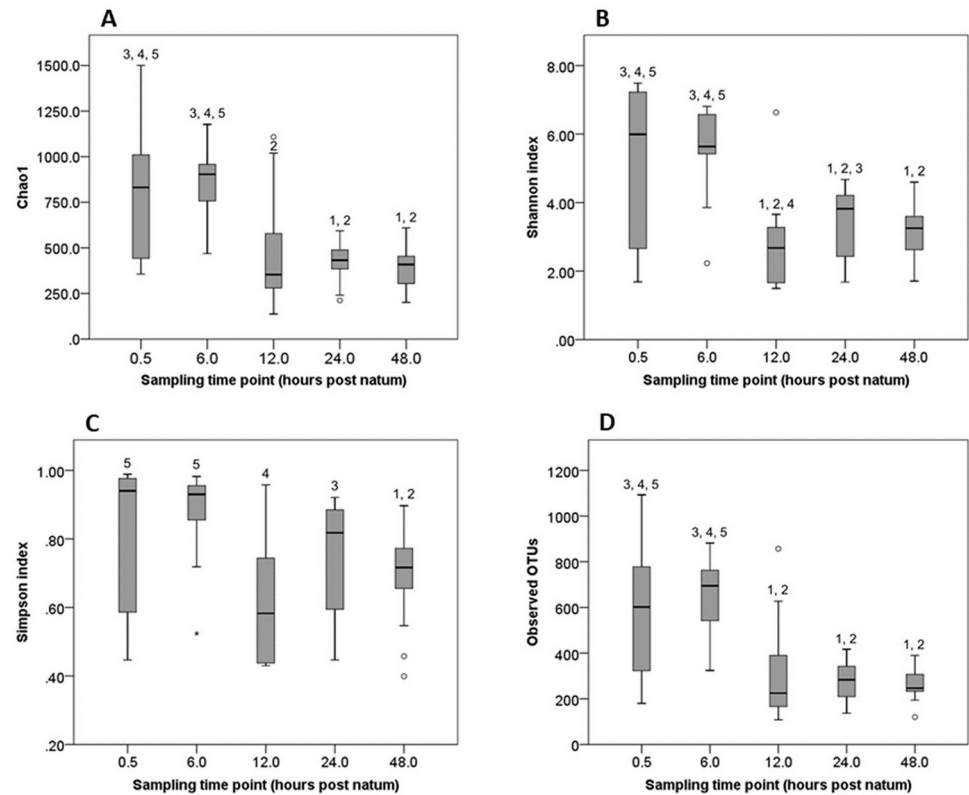

**Fig 2. (A) Species richness (Chao1), (B) Shannon and (C) Simpson diversity index and (D) number of observed OTUs in calf faeces during the five sampling time points.** Data are visualized as box-and-whisker plots showing the median and the interquartile (midspread) range (boxes containing 50% of all values), the whiskers (representing the 25 and 75 percentiles) and the extreme data points. Numbers above boxes indicate significant differences to the time points.

<https://doi.org/10.1371/journal.pone.0220554.g002>

Generally, a significant decrease between early time points 1 and 2 (0.5 and 6 hours *p.n.*) and later time points 3 to 5 (12 to 48 hours *p.n.*) was found (Fig 2).

The OTUs affiliated to 30 bacterial phyla with *Proteobacteria*, *Firmicutes*, *Actinobacteria*, and *Bacteroidetes* being the most abundant. *Proteobacteria* were most abundant in calf faecal samples during all sampling time points with a median relative abundance ranging from 71.9 to 91.2% (S1 Fig). *Actinobacteria* and *Bacteroidetes* decreased from time points 1 and 2 (0.5 and 6 hours *p.n.*) to time point 3 (12 hours *p.n.*) and remained low through the other time points (24 and 48 hours *p.n.*). *Proteobacteria* increased from time point 1 to 3, and *Firmicutes* increased from time point 3 to 5.

Calf faecal samples were clearly dominated by *Gammaproteobacteria* OTUs with *E. coli* / *Shigella* and *Acinetobacter* OTUs being most abundant. At all five sampling time points, OTU-1 (unclassified *Enterobacteriaceae*) was most abundant, with a median relative abundance varying between 26.0% during time point 2 and 59.0% during time point 3. The overall median relative abundance was 40.0%. The 50 most abundant OTUs in calf faecal samples accounted for 62.7 and 58.2% of all reads during time points 1 and 2 and for more than 90% of all reads during time points 3 to 5.

The majority ( $\geq 70\%$ ) of the top 50 OTUs over all calf faecal samples differed significantly between time points 1 and 2 and between later time points 4 and 5. Several OTUs (e.g. OTU-2 *Enhydrobacter*, OTU-4 *Acinetobacter indicus*, OTU-11 *Sphingomonas*, OTU-18 *Acinetobacter*,

OTU-19 *Solibacillus*, OTU-28 *Pseudomonas*, OTU-30 *Acinetobacter lwoffii*, OTU-31 unclassified *Ruminococcaceae*, OTU-32 unclassified *Clostridiales*, OTU-33 *Propionibacterium acnes*, OTU-34 unclassified *Ruminococcaceae*, and OTU-47 *Stenotrophomonas*) were only found during the first two to three sampling time points, and others were found only during later time points 4 and 5 (e.g. OTU-14 *Clostridium butyricum*, OTU-16 unclassified *Enterobacteriaceae*). In contrast, there were few significant differences when comparing time point 1 with time point 2, and comparing time point 4 with time point 5. This indicated a change in the most abundant OTUs between 6 and 24 hours *p.n.* (Fig 3).

Copy numbers, obtained by qPCR using a general 16S rRNA gene primer set, revealed a significant 115-fold increase in copy numbers during late time points (24h and 48h *p.n.*, median:  $5.84 \times 10^6$  copy numbers) compared with earlier time points (median:  $5.09 \times 10^4$  copy numbers) (Table 1).

### Microbiota of the cow (vagina, faeces, and colostrum)

Significantly higher species richness, diversity, and number of observed OTUs were detected in cow faecal samples when compared to all other samples.

The composition of microbial communities on phylum level revealed distinct differences between the different sampling sites (S1 Fig). *Firmicutes* were most abundant in cow vaginal and faecal samples (median relative abundance 63.4 and 93.7%, respectively) whereas colostrum was clearly dominated by *Proteobacteria* with a median relative abundance of 84.9%.

In cow faeces a high inter-individual similarity was seen. Overall, 382 OTUs were shared by all 15 cow faecal samples. These OTUs accounted for 77.4% of all reads in these samples. In contrast, vaginal and colostrum samples shared 17 and 32 OTUs (accounting for 9.8 and 64.1% of all reads), respectively. OTUs belonging to the family *Ruminococcaceae* were most abundant in cow vaginal and especially faecal samples with a median relative abundance of 59.1 and 84.8%. Colostrum was dominated by *Enhydrobacter* affiliated OTUs (overall median relative abundance 80.5%; S1 Table).

Copy numbers obtained by qPCR revealed significant higher counts in cow faeces compared with all other sampling sites ( $> 1.39 \times 10^8$  copy numbers). Colostrum, cow vagina, and calf mouth copy numbers ranged from  $3.24 \times 10^3$  to  $1.17 \times 10^6$ . Exact values are listed in Table 2.

### OTUs specific for cow or calf samples

Among the 50 most abundant OTUs over all samples, we identified some OTUs which were only found in cow samples. These included OTU-10 (*Gallibacterium*) and OTU-31 (unclassified *Ruminococcaceae*), which were found only in cow faecal samples, as well as colostrum-associated OTUs such as OTU-12 (*Meiothermus*), OTU-37 (*Enhydrobacter*), OTU-44 (*Chryseobacterium*), or OTU-50 (*Sphingobacterium faecium*). None of these OTUs were detected in cow vaginal samples. In contrast, OTU-5 (*Clostridium*), OTU-8 (*Clostridium perfringens*), OTU-9 (*Proteus*), OTU-14 (*Clostridium butyricum*), OTU-17 (unclassified *Clostridiaceae*), OTU-15 (*Morganella*), and OTU-16 (unclassified *Enterobacteriaceae*) were exclusively detected in calf samples.

Weighted UniFrac distances were calculated and represented as a principal coordinates analysis (PCoA, Fig 4). In contrast to the high inter-individual similarity between cow faecal samples, all other samples showed considerable differences. Cow faeces that showed a high similarity within the group clustered together. Calf faecal samples shifted throughout the time. Time points 1 and 2 did not cluster together, and samples show similarity to calf mouth and colostrum. Later time points clustered, indicating a stabilisation of faecal microbiota at later time points.

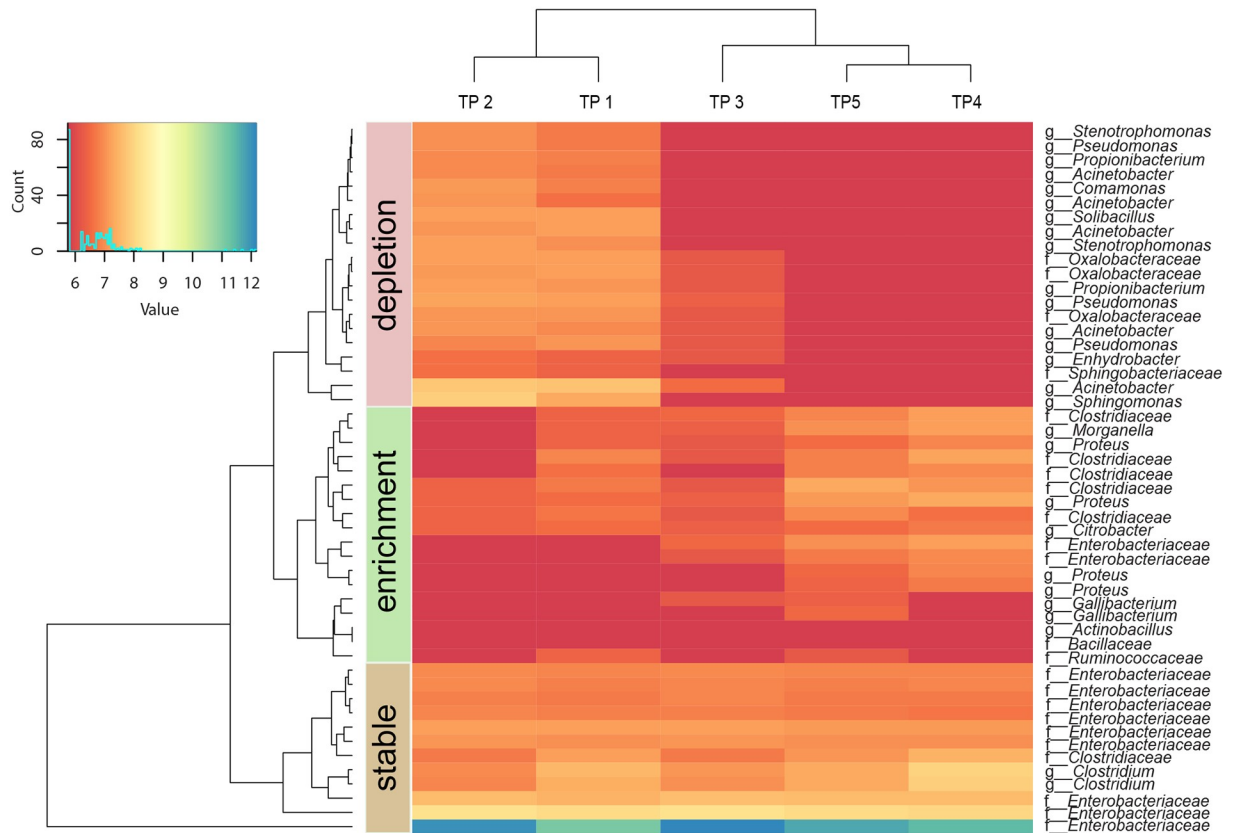

**Fig 3. The 50 most abundant OTUs in calf faecal samples and time-related abundance shifts.** The dendrogram was built based on Euclidean measures and was used to define the abundance clusters 'stable' (stable abundance), 'enrichment' (abundance increase over time) and 'depletion' (abundance decrease over time). TP = time point, TP 1 = 0.5 hours *post natum* (*p.n.*), TP 2 = 6 hours *p.n.*, TP 3 = 12 hours *p.n.*, TP 4 = 24 hours *p.n.*, TP 5 = 48 hours *p.n.*

<https://doi.org/10.1371/journal.pone.0220554.g003>

### Possible sources of the newborn calf faecal microbiota during the first 48 hours of life

To evaluate possible sources of the newborn calf faecal microbiota, vaginal samples, cow faecal samples, colostrum, and the calf mouth were examined as possible sources.

**Table 1. Results of qPCR for calf faecal samples (along the time line).**

|                                | Calf faeces sampling time point (TP*) |                      |                      |                      |                      |
|--------------------------------|---------------------------------------|----------------------|----------------------|----------------------|----------------------|
|                                | TP 1                                  | TP 2                 | TP 3                 | TP 4                 | TP 5                 |
| Median                         | 8.74×10 <sup>3</sup>                  | 1.08×10 <sup>5</sup> | 3.60×10 <sup>4</sup> | 5.77×10 <sup>6</sup> | 5.91×10 <sup>6</sup> |
| Percentile 25%                 | 4.26×10 <sup>3</sup>                  | 2.53×10 <sup>4</sup> | 5.64×10 <sup>3</sup> | 2.37×10 <sup>6</sup> | 2.83×10 <sup>6</sup> |
| Percentile 75%                 | 1.37×10 <sup>5</sup>                  | 2.16×10 <sup>5</sup> | 7.59×10 <sup>5</sup> | 1.40×10 <sup>7</sup> | 2.78×10 <sup>7</sup> |
| Minimum                        | 2.24×10 <sup>2</sup>                  | 1.08×10 <sup>3</sup> | 5.22×10 <sup>2</sup> | 1.44×10 <sup>4</sup> | 2.62×10 <sup>5</sup> |
| Maximum                        | 1.61×10 <sup>6</sup>                  | 5.25×10 <sup>5</sup> | 2.00×10 <sup>7</sup> | 2.16×10 <sup>7</sup> | 5.60×10 <sup>7</sup> |
| Significantly different to TP* | 4, 5                                  | 4, 5                 | 4, 5                 | 1, 2, 3              | 1, 2, 3              |

Descriptive statistics and results of paired Wilcoxon test with Benjamini-Hochberg correction ( $P < 0.05$ ) are given.

\*TP 1 = 0.5 hours *post natum* (*p.n.*), TP 2 = 6 hours *p.n.*, TP 3 = 12 hours *p.n.*, TP 4 = 24 hours *p.n.*, TP 5 = 48 hours *p.n.*

<https://doi.org/10.1371/journal.pone.0220554.t001>



**Table 2. Copy number results of qPCR for cow faeces, cow colostrum, cow vagina, and calf mouth samples.**

|                | Cow faeces         | Colostrum          | Cow vagina         | Calf mouth         |
|----------------|--------------------|--------------------|--------------------|--------------------|
| Median         | $5.00 \times 10^8$ | $4.55 \times 10^5$ | $2.95 \times 10^4$ | $1.27 \times 10^4$ |
| Percentile 25% | $2.72 \times 10^8$ | $1.34 \times 10^5$ | $2.19 \times 10^4$ | $7.06 \times 10^3$ |
| Percentile 75% | $6.34 \times 10^9$ | $1.17 \times 10^6$ | $2.88 \times 10^5$ | $2.38 \times 10^4$ |
| Minimum        | $1.39 \times 10^8$ | $6.43 \times 10^4$ | $8.14 \times 10^3$ | $3.24 \times 10^3$ |
| Maximum        | $8.32 \times 10^9$ | $2.30 \times 10^6$ | $9.41 \times 10^5$ | $2.88 \times 10^4$ |

Results of descriptive statistics are given. Paired Wilcoxon test with Benjamini-Hochberg correction revealed a significant difference ( $P < 0.05$ ) between all four sampling sites.

<https://doi.org/10.1371/journal.pone.0220554.t002>

Thirteen of the 50 most abundant OTUs were shared between cow vaginal and calf faecal samples: OTU-4 (*Acinetobacter*), OTU-6 (unclassified *Enterobacteriaceae*), OTU-7 (unclassified *Ruminococcaceae*), OTU-19 (*Solibacillus*), OTU-20 and OTU-21 (unclassified *Ruminococcaceae*), OTU-22 (unclassified *Enterobacteriaceae*), OTU-28 (*Pseudomonas*), OTU-30 (*Acinetobacter lwoffii*), OTU-32 (unclassified *Clostridiales*), OTU-33 (*Propionibacterium acnes*), OTU-46 (unclassified *Enterobacteriaceae*), and OTU-48 (*Comamonas*). These OTUs were mainly shared between early time points 1 to 3, but some (OTU-6, OTU-22, and OTU-46 unclassified *Enterobacteriaceae*) were also shared during later time points 4 and 5.

Four of the 50 most abundant OTUs, OTU-20, OTU-21 (both unclassified *Ruminococcaceae*), OTU-32 (unclassified *Clostridiales*), and OTU-48 (*Comamonas*), were shared between cow and calf faecal samples but only during early time points 1 to 3.

The colostrum and calf faecal microbiota shared 10 out of the 50 most abundant OTUs: OTU-1 and OTU-3 (unclassified *Enterobacteriaceae*), OTU-2 and OTU-13 (*Enhydrobacter*), OTU-4 and OTU-18 (*Acinetobacter*), OTU-28 (*Pseudomonas*), OTU-33 (*Propionibacterium*

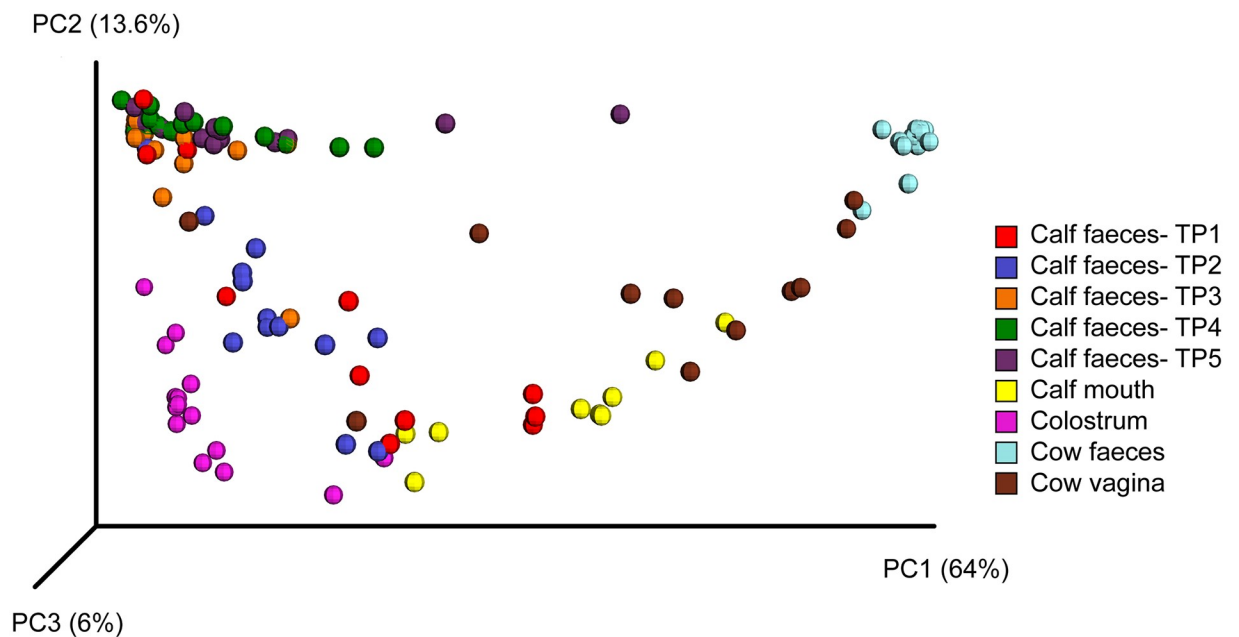

**Fig 4. Principal Coordinate Analysis (PCoA) of 16S rRNA gene OTUs based on Weighted UniFrac distances.** Dots are colored regarding the sample type. TP = time point, TP 1 = 0.5 hours *post natum* (*p.n.*), TP 2 = 6 hours *p.n.*, TP 3 = 12 hours *p.n.*, TP 4 = 24 hours *p.n.*, TP 5 = 48 hours *p.n.*

<https://doi.org/10.1371/journal.pone.0220554.g004>

*acnes*), OTU-47 (*Stenotrophomonas*), and OTU-48 (*Comamonas*). All of these OTUs were only shared between colostrum and early calf faecal sampling time points 1 to 3, not with time points 4 and 5.

Calf mouth and calf faecal microbiota shared several of the 50 most abundant OTUs, such as OTU-4 (*Acinetobacter*), OTU-6 (unclassified *Enterobacteriaceae*), OTU-11 (*Sphingomonas*), OTU-18 (*Acinetobacter*), OTU-19 (*Solibacillus*), OTU-20 and OTU-21 (unclassified *Ruminococcaceae*), OTU-28 (*Pseudomonas*), OTU-30 (*Acinetobacter lwoffii*), OTU-32 (unclassified *Clostridiales*), OTU-33 (*Propionibacterium acnes*), OTU-47 (*Stenotrophomonas*), and OTU-48 (*Comamonas*).

Connections between samples can be visualized as an OTU network shown in Fig 5. In Fig 5A all samples are represented, and three edges that harbor cow faeces, colostrum or late-time point calf faeces, respectively, can be observed. The center of the network, which is occupied by all the samples and OTUs with more connections with other elements in the network, revealed close relationships between the calf faeces samples (at early time points), calf mouth samples, and cow vagina samples. As time increased calf faecal samples tended to cluster together along one of the edges of the network. The evolution of calf faecal microbiota can be observed in Fig 5B where only calf faecal samples are represented. Time points 1 and 2 showed a high number of low abundant OTUs, most of which were only found in these two time points. Microbial communities develop and establish throughout time, and samples with a lower number of high abundance OTUs clustered together.

## Discussion

The intestinal microbiota has an important effect on the development of the newborn's immunity and metabolism, especially energy metabolism [25], and consequently on health, performance, and overall welfare. Hence, in our study we examined the early calf faecal microbiota and its possible sources.

In the present study, we choose to examine faeces as this is a non-invasive and practicable method to sample animals repeatedly without euthanasia. It should however be noted, that faecal samples do not fully represent the microbiota of particularly the upper gastro-intestinal tract. It is known that the microbiota of gastro-intestinal luminal content and of mucosal or epithelial surfaces of the gastro-intestinal tract differs [3, 26]. Consequently, the presented results of faecal samples examinations do not fully reflect early colonization processes of mucosal or epithelial gastro-intestinal tract surfaces.

### The calf microbiota is highly variable during the first 48 hours of life

In the present study we provide detailed analyses of the faecal calf microbiota during the first two days of life. Species richness and diversity, as well as the number of observed OTUs, differed significantly within calf faecal samples and were significantly lower than in adult cattle. An increase in species richness and diversity with increasing age has been described in other studies [5, 27–29]. In contrast, during the short time period of two days *p.n.*, species richness, diversity, and number of observed OTUs decreased significantly between 6 and 24 hours *p.n.* in our study. A decrease in mean Chao1, Shannon diversity index, and observed OTUs, during the first one to two days *p.n.* was also seen in calves in the studies of Alipour et al. [2] and Yeoman et al. [3], although their numbers were considerably lower than in our study. Similar results were obtained in humans and mice [30–32]. Possible explanations given by these authors are selective effects from the environment, especially milk, and a higher diversity immediately *p.n.* caused by prenatal colonisation.

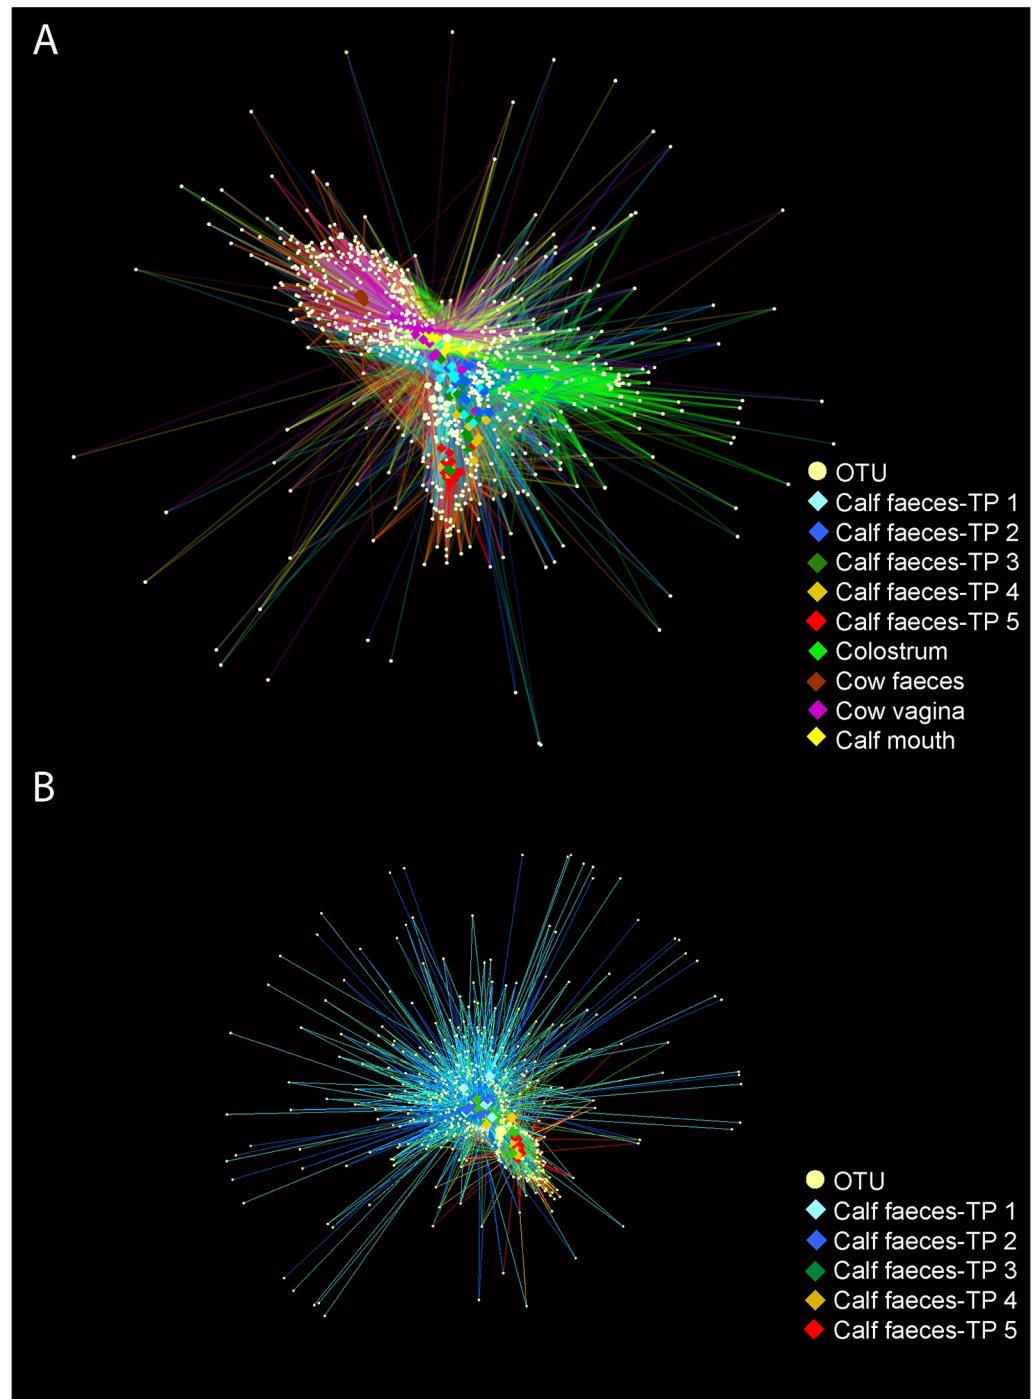

**Fig 5. OTU sharing network.** Light-yellow circular nodes represent the different OTUs (more abundant than 0.01% overall) and the size of each node is proportional to their relative abundance. The diamond shaped nodes represent the samples and are colored regarding the different types of samples. OTUs and the samples they belong to are connected by colored lines corresponding to the type of the sample. TP = time point, TP 1 = 0.5 hours *post natum* (*p.n.*), TP 2 = 6 hours *p.n.*, TP 3 = 12 hours *p.n.*, TP 4 = 24 hours *p.n.*, TP 5 = 48 hours *p.n.*

<https://doi.org/10.1371/journal.pone.0220554.g005>

As shown by qPCR, copy numbers increased significantly between 6 and 24 hours *p.n.*, as has also been seen in calves [2] as well as in humans [33].

In general, the calf faecal microbiota was clearly dominated by *Proteobacteria*, followed by *Firmicutes*, *Actinobacteria*, and *Bacteroidetes*. In contrast to *Proteobacteria* and *Firmicutes*, *Actinobacteria* and *Bacteroidetes* were only present during early time points (0.5 and 6.0 hours *p.n.*). These findings are comparable to the findings in studies in newborn calves and humans [2, 3, 34]. During later time points and in adult cattle *Proteobacteria* usually decrease and *Firmicutes* and *Bacteroidetes* dominate the faecal microbiota [2, 3, 28, 29, 35, 36]. At OTU level, the calf faecal microbiota was dominated by unclassified *Enterobacteriaceae* OTUs which were found in all samples. Similarly, the faecal microbiota of newborn calves was dominated by unclassified *Enterobacteriaceae* in the studies of Alipour et al. [2] and Yeoman et al. [3]. We identified several OTUs which were only found during the first two to three sampling time points (immediately after birth to 12 hours *p.n.*) and OTUs which were found only during the later time points 4 and 5 (24 and 48 hours *p.n.*). This indicated a change in the most abundant OTUs between 6 and 12 hours *p.n.* and after 24 hours *p.n.* These findings are similar to the finding of Mayer et al. [37] that the main change in the bacterial flora in calf faeces was detected between 12 and 24 hours *p.n.* Generally, the microbiota seems to become more stable from earlier to later time points in humans and cattle [27, 38].

### Microbiota of the cow (vagina, faeces, and colostrum) revealed clear dominance of OTUs belonging to one family and genus

In the present study, unassigned *Ruminococcaceae* OTUs were most abundant in cow vaginal samples. This is similar to the findings of Clemmons et al. [39] in bovine vaginal samples *post partum* (*p.p.*). Furthermore, Karstrup et al. [40] examined endometrium and placentomes of pregnant cows and described a high abundance of bacteria belonging to the family *Ruminococcaceae*. Laguardia-Nascimento et al. [41] and Yeoman et al. [3] detected that, among others, *Ruminococcus* belonged to the vaginal core microbiota in cattle.

Similarly, the cow faecal microbiota was clearly dominated by unclassified *Ruminococcaceae*. This high abundance of *Ruminococcaceae* in cow vaginal and faecal samples indicates similarity between these two sampling sites. Overall, cow vaginal and faecal microbiota shared 30.3% of their OTUs. A similarity can also be seen in OTU sharing networks (Fig 5A). Jeon et al. [42] also detected similarities in the cow vaginal, faecal, and blood bacterial composition immediately *p.p.*, suggesting some haematogenic spread from the intestines to the reproductive tract.

*Enhydrobacter* was the most abundant OTU found in colostrum samples of our study. It should be noted that the taxonomy of the genus *Enhydrobacter* is currently under discussion, and it has been suggested that *Enhydrobacter* should be placed in the *Alphaproteobacteria* [43]. In contrast to our study, bovine colostrum samples of other studies were dominated by *Lactococcus*, *Staphylococcus*, *Pseudomonas*, *Streptococcus*, and *Escherichia* [3, 44]. In human colostrum samples, *Staphylococcus* and *Streptococcus* were also regularly detected, as well as *Enhydrobacter*, although other bacteria seem to be of higher abundance in human colostrum [45–48]. In bovines, *Enhydrobacter* were so far only described in cheese made from raw cow's milk [49–51].

### Potential sources of the microbiota of newborn calves during the first 48 hours of life include the vaginas of their mothers and other unexamined factors e.g. environment

To identify possible inoculation routes for the calf microbiota, we analysed OTUs shared between samples. The calf microbiota during the first two days of life was clearly distinct from

the dam's faecal microbiota as well as from microbial communities from adult cattle from other studies which were dominated by OTUs assigned to *Ruminococcaceae*, *Prevotella*, *Paraprevotellaceae*, *Lachnospiraceae*, *Turicibacter*, *Bacteroidaceae*, *Succinivibrio*, and *Clostridiaceae* [8, 28, 35, 36]. This finding is not surprising as a newborn calf is fed by liquid feed only and has not developed a functional rumen yet. Similarly, Alipour et al. [2] found differences between the newborn calf and cow faecal microbiota that became more similar within 7 days after birth.

All calves in this study were fed with their mother's colostrum within two hours *p.n.* Our results indicate that the colostrum microbiota is distinct from the calf and cow faecal microbiota and thus most likely does not play an important role as inoculation source for calf microbiota during the first two days of life. Potentially, colostrum has a beneficial effect on the calf gastrointestinal microbiota later in life, as suggested in the study of Yeoman et al. [3] or may influence the intestinal epithelial microbiota, what has not been examined in the present study. The most abundant colostrum OTUs of our study such as *Enhydrobacter* are not known to be abundant in the cattle digestive tract. In agreement with current knowledge, the main benefit of feeding first colostrum to calves within the first hours *p.n.* is the provision of immunoglobulins [52].

All calves in our study were delivered vaginally. An inoculation of newborns with the microbiota of their mother's birth canal has been described in humans [13]. Newer studies suggest that in humans the vaginal microbiota is not a source of the infant's faecal microbiota [53, 54]. In cattle the results are also contradictory [2, 3]. In contrast to the colostrum and cow faecal microbiota in our study, the cow vaginal and the calf faecal microbiota were more similar (as can be seen in OTU sharing networks, Fig 5A) and shared overall 2,240 OTUs, suggesting that some of the calf faecal microbiota may derive from inoculation from the birth canal.

Another possible inoculation source of the calf microbiota might arise from the calf licking the vagina or the environment during and immediately after birth. A few OTUs showed highest abundance in the calf mouth samples taken within 0.5 hours *p.n.* such as OTU-4 (*Acinetobacter*) and OTU-19 (*Solibacillus*) and were also detected in faecal calf and cow samples, but their abundance in faecal samples decreased and they could not be detected further. We thus assume that the calf's mouth is not a significant source of inoculation of the gastrointestinal tract microbiota during the first two days of life.

Interestingly, we identified a number of OTUs which showed intermediate abundances which were only found in calf faecal samples. These OTUs can derive from other, potentially environmental, sources that were not sampled in our study or might represent OTUs that were already present in the gastrointestinal tract before birth. A possible inoculation of the fetus with bacteria before birth has been suggested in humans, mice, and cattle [2, 48, 55–57]. Based on the presence of a diverse microbiota and comparatively high copy numbers (median:  $8.74 \times 10^3$  copy numbers) in a relatively short time period after birth (0.5 hours *p.n.*) we believe that an inoculation of these OTUs from the vagina, colostrum, or environment is rather unlikely. The fact that these OTUs were generally not present in the calf mouth also indicates that these OTUs might already have been present in the fetus before birth. Further studies are nevertheless necessary to elucidate this hypothesis.

Summarizing the potential sources of the early faecal microbiota of newborn calves reveal that the bacteria found in the first calf faecal samples (sampled within 0.5 h *p.n.*) can have an intra-uterine origin, as it would be unlikely that microbes from the vagina of the mother, colostrum, or environment are detected in faecal samples that early. Some of the calves' faecal microbes detected can be explained by vaginal transmission during birth. Several OTUs common to vagina and calf mouth were also found in calf faeces during early sampling time points 1 to 3 (0.5 to 12 hours *p.n.*). The fact that the majority of these OTUs were not detected at later

time points suggests that once the calves are exposed to the environment and to the milk diet their gut microbiome shapes. The fact that not many OTUs have been shared by colostrum and calf faeces may indicate that colostrum does not play an important role as a source of intestinal microorganisms, but is of importance from an immunological point of view.

## Conclusion

The calf faecal microbiota was highly variable during the first 48 hours *p.n.* The calf faecal microbiota during the first two days of life was clearly distinct from the mother's faecal microbiota and colostrum. In contrast, the cow vaginal and the calf faecal microbiota were more similar, suggesting that some of the calf faecal microbiota may derive from inoculation from the birth canal during birth. Other sources not examined in the present study could be the environment and the uterus *ante natum*.

## Supporting information

**S1 Table. The 50 most abundant OTUs per sampling group, median (Med) relative abundance (%) and 25 and 75% percentile (%) are listed.** OTU consensus taxonomy is based on the GreenGenes 16S rRNA gene database.

(XLSX)

**S1 Fig. Median relative abundance of phyla in the different samples and significant ( $P \leq 0.05$ ) differences to other samples.** TP = time point, TP 1 = 0.5 hours post natum (*p.n.*), TP 2 = 6 hours *p.n.*, TP 3 = 12 hours *p.n.*, TP 4 = 24 hours *p.n.*, TP 5 = 48 hours *p.n.* (TIF)

## Acknowledgments

The authors are grateful for the chance to undertake this study at FirstFarms Agro. We thank Bienvenido Cortes (Iowa State University) for English proof reading.

## Author Contributions

**Conceptualization:** Daniela Klein-Jöbstl, Stephan Schmitz-Esser.

**Data curation:** Narciso M. Quijada, Monika Dzieciol, Benjamin Feldbacher, Evelyne Mann.

**Formal analysis:** Daniela Klein-Jöbstl, Narciso M. Quijada, Monika Dzieciol, Stephan Schmitz-Esser, Evelyne Mann.

**Funding acquisition:** Daniela Klein-Jöbstl.

**Investigation:** Daniela Klein-Jöbstl, Narciso M. Quijada, Monika Dzieciol, Benjamin Feldbacher, Evelyne Mann.

**Methodology:** Narciso M. Quijada, Monika Dzieciol, Benjamin Feldbacher, Stephan Schmitz-Esser, Evelyne Mann.

**Project administration:** Daniela Klein-Jöbstl, Stephan Schmitz-Esser, Evelyne Mann.

**Resources:** Daniela Klein-Jöbstl, Monika Dzieciol, Martin Wagner, Marc Drillich, Stephan Schmitz-Esser, Evelyne Mann.

**Software:** Narciso M. Quijada, Stephan Schmitz-Esser, Evelyne Mann.

**Supervision:** Daniela Klein-Jöbstl, Monika Dzieciol, Martin Wagner, Marc Drillich, Stephan Schmitz-Esser, Evelyne Mann.

**Validation:** Stephan Schmitz-Esser, Evelyne Mann.

**Visualization:** Daniela Klein-Jöbstl, Narciso M. Quijada, Stephan Schmitz-Esser, Evelyne Mann.

**Writing – original draft:** Daniela Klein-Jöbstl, Stephan Schmitz-Esser, Evelyne Mann.

**Writing – review & editing:** Daniela Klein-Jöbstl, Narciso M. Quijada, Monika Dzieciol, Martin Wagner, Marc Drillich, Stephan Schmitz-Esser, Evelyne Mann.

## References

1. Maynard CL, Elson CO, Hatton RD, Weaver CT. Reciprocal interactions of the intestinal microbiota and immune system. *Nature*. 2012; 489(7415):231–41. <https://doi.org/10.1038/nature11551> PMID: 22972296
2. Alipour MJ, Jalanka J, Pessa-Morikawa T, Kokkonen T, Satokari R, Hynonen U, et al. The composition of the perinatal intestinal microbiota in cattle. *Scientific Reports*. 2018; 8(1):10437. <https://doi.org/10.1038/s41598-018-28733-y> PMID: 29993024
3. Yeoman CJ, Ishaq SL, Bichi E, Olivo SK, Lowe J, Aldridge BM. Biogeographical differences in the influence of maternal microbial sources on the early successional development of the bovine neonatal gastrointestinal tract. *Scientific Reports*. 2018; 8(1). <https://doi.org/10.1038/s41598-018-21440-8> PMID: 29453364
4. Jami E, Israel A, Kotser A, Mizrahi I. Exploring the bovine rumen bacterial community from birth to adulthood. *The ISME Journal*. 2013; 7(6):1069–79. <https://doi.org/10.1038/ismej.2013.2> PMID: 23426008
5. Oikonomou G, Teixeira AGV, Foditsch C, Bicalho ML, Machado VS, Bicalho RC. Fecal microbial diversity in pre-weaned dairy calves as described by pyrosequencing of metagenomic 16S rDNA. Associations of *Faecalibacterium* species with health and growth. *PLoS ONE*. 2013; 8(4). <https://doi.org/10.1371/journal.pone.0063157> PMID: 23646192
6. Uyeno Y, Sekiguchi Y, Kamagata Y. rRNA-based analysis to monitor succession of faecal bacterial communities in Holstein calves. *Letters in Applied Microbiology*. 2010; 51(5):570–7. <https://doi.org/10.1111/j.1472-765X.2010.02937.x> PMID: 20849397
7. Meale SJ, Chaucheyras-Durand F, Berends H, Guan LL, Steele MA. From pre- to postweaning: Transformation of the young calf's gastrointestinal tract. *Journal of Dairy Science*. 2017; 100(7):5984–95. <https://doi.org/10.3168/jds.2016-12474> PMID: 28527800
8. Dill-McFarland KA, Breaker JD, Suen G. Microbial succession in the gastrointestinal tract of dairy cows from 2 weeks to first lactation. *Scientific Reports*. 2017; 7. <https://doi.org/10.1038/srep40864> PMID: 28098248
9. Malmuthuge N, Griebel PJ, Guan LL. The gut microbiome and its potential role in the development and function of newborn calf gastrointestinal tract. *Frontiers in Veterinary Science*. 2015; 2(SEP). <https://doi.org/10.3389/fvets.2015.00036> PMID: 26664965
10. Malmuthuge N, Guan LL. Understanding the gut microbiome of dairy calves: Opportunities to improve early-life gut health. *Journal of Dairy Science*. 2017; 100(7):5996–6005. <https://doi.org/10.3168/jds.2016-12239> PMID: 28501408
11. Sommer F, Bäckhed F. The gut microbiota-masters of host development and physiology. *Nature Reviews Microbiology*. 2013; 11(4):227–38. <https://doi.org/10.1038/nrmicro2974> PMID: 23435359
12. Gritz EC, Bhandari V. The human neonatal gut microbiome: a brief review. *Frontiers in Pediatrics*. 2015; 3:17. <https://doi.org/10.3389/fped.2015.00017> PMID: 25798435
13. Dominguez-Bello MG, Costello EK, Contreras M, Magris M, Hidalgo G, Fierer N, et al. Delivery mode shapes the acquisition and structure of the initial microbiota across multiple body habitats in newborns. *Proceedings of the National Academy of Sciences of the United States of America*. 2010; 107(26):11971–5. <https://doi.org/10.1073/pnas.1002601107> PMID: 20566857
14. Prunner I, Wagener K, Pothmann H, Ehling-Schulz M, Drillich M. Risk factors for uterine diseases on small- and medium-sized dairy farms determined by clinical, bacteriological, and cytological examinations. *Theriogenology*. 2014; 82(6):857–65. <https://doi.org/10.1016/j.theriogenology.2014.06.015> PMID: 25066047
15. Schmieder R, Edwards R. Quality control and preprocessing of metagenomic datasets. *Bioinformatics*. 2011; 27(6):863–4. <https://doi.org/10.1093/bioinformatics/btr026> PMID: 21278185
16. Magoč T, Salzberg SL. FLASH: fast length adjustment of short reads to improve genome assemblies. *Bioinformatics*. 2011; 27(21):2957–63. <https://doi.org/10.1093/bioinformatics/btr507> PMID: 21903629

17. Caporaso JG, Lauber CL, Walters WA, Berg-Lyons D, Lozupone CA, Turnbaugh PJ, et al. Global patterns of 16S rRNA diversity at a depth of millions of sequences per sample. *Proceedings of the National Academy of Sciences of the United States of America*. 2011; 108 Suppl 1:4516–22. <https://doi.org/10.1073/pnas.1000080107> PMID: 20534432
18. Edgar RC. Search and clustering orders of magnitude faster than BLAST. *Bioinformatics*. 2010; 26(19):2460–1. <https://doi.org/10.1093/bioinformatics/btq461> PMID: 20709691
19. Wang Q, Garrity GM, Tiedje JM, Cole JR. Naive Bayesian classifier for rapid assignment of rRNA sequences into the new bacterial taxonomy. *Appl Environ Microbiol*. 2007; 73(16):5261–7. <https://doi.org/10.1128/AEM.00062-07> PMID: 17586664
20. McDonald D, Price MN, Goodrich J, Nawrocki EP, DeSantis TZ, Probst A, et al. An improved GreenGenes taxonomy with explicit ranks for ecological and evolutionary analyses of bacteria and archaea. *ISME J*. 2012; 6(3):610–8. <https://doi.org/10.1038/ismej.2011.139> PMID: 22134646
21. Lozupone C, Lladser ME, Knights D, Stombaugh J, Knight R. UniFrac: an effective distance metric for microbial community comparison. *The ISME Journal*. 2011; 5(2):169–72. <https://doi.org/10.1038/ismej.2010.133> PMID: 20827291
22. Shannon P, Markiel A, Ozier O, Baliga NS, Wang JT, Ramage D, et al. Cytoscape: a software environment for integrated models of biomolecular interaction networks. *Genome Res*. 2003; 13(11):2498–504. <https://doi.org/10.1101/gr.1239303> PMID: 14597658
23. Metzler-Zebeli BU, Schmitz-Esser S, Klevenhusen F, Podstatzky-Lichtenstein L, Wagner M, Zebeli Q. Grain-rich diets differently alter ruminal and colonic abundance of microbial populations and lipopolysaccharide in goats. *Anaerobe*. 2013; 20:65–73. <https://doi.org/10.1016/j.anaerobe.2013.02.005> PMID: 23474085
24. Větrovský T, Baldrian P. The variability of the 16S rRNA gene in bacterial genomes and its consequences for bacterial community analyses. *PLoS One*. 2013; 8(2):e57923. <https://doi.org/10.1371/journal.pone.0057923> PMID: 23460914
25. Korpela K, de Vos WM. Early life colonization of the human gut: microbes matter everywhere. *Current Opinion in Microbiology* 2018; 44:70–8. <https://doi.org/10.1016/j.mib.2018.06.003> PMID: 30086431
26. Malmuthuge N, Griebel PJ, Guan LL. Taxonomic identification of commensal bacteria associated with the mucosa and digesta throughout the gastrointestinal tracts of preweaned calves. *Applied and Environmental Microbiology*. 2014; 80(6):2021–8. <https://doi.org/10.1128/AEM.03864-13> PMID: 24441166
27. Klein-Jöbstl D, Schornsteiner E, Mann E, Wagner M, Drillich M, Schmitz-Esser S. Pyrosequencing reveals diverse fecal microbiota in Simmental calves during early development. *Frontiers in Microbiology*. 2014; 5:622. <https://doi.org/10.3389/fmicb.2014.00622> PMID: 25452753
28. Shanks OC, Kelty CA, Archibeque S, Jenkins M, Newton RJ, McLellan SL, et al. Community structures of fecal bacteria in cattle from different animal feeding operations. *Applied and Environmental Microbiology*. 2011; 77(9):2992–3001. <https://doi.org/10.1128/AEM.02988-10> PMID: 21378055
29. Edrington TS, Dowd SE, Farrow RF, Hagevoort GR, Callaway TR, Anderson RC, et al. Development of colonic microflora as assessed by pyrosequencing in dairy calves fed waste milk. *Journal of Dairy Science*. 2012; 95(8):4519–25. <https://doi.org/10.3168/jds.2011-5119> PMID: 22818466
30. Dominguez-Bello MG, De Jesus-Laboy KM, Shen N, Cox LM, Amir A, Gonzalez A, et al. Partial restoration of the microbiota of cesarean-born infants via vaginal microbial transfer. *Nature Medicine*. 2016; 22(3):250–3. <https://doi.org/10.1038/nm.4039> PMID: 26828196
31. Mueller NT, Shin H, Pizoni A, Werlang IC, Matte U, Goldani MZ, et al. Delivery mode and the transition of pioneering gut-microbiota structure, composition and predicted metabolic function. *Genes (Basel)*. 2017; 8(12). <https://doi.org/10.3390/genes8120364> PMID: 29207565
32. Pantoja-Feliciano IG, Clemente JC, Costello EK, Perez ME, Blaser MJ, Knight R, et al. Biphasic assembly of the murine intestinal microbiota during early development. *The ISME Journal*. 2013; 7(6):1112–5. <https://doi.org/10.1038/ismej.2013.15> PMID: 23535917
33. Obermajer T, Grabnar I, Benedik E, Tusar T, Robic Pikel T, Fidler Mis N, et al. Microbes in infant gut development: Placing abundance within environmental, clinical and growth parameters. *Science Reports*. 2017; 7(1):11230. <https://doi.org/10.1038/s41598-017-10244-x> PMID: 28894126
34. Dogra S, Sakwinska O, Soh SE, Ngom-Bru C, Bruck WM, Berger B, et al. Rate of establishing the gut microbiota in infancy has consequences for future health. *Gut Microbes*. 2015; 6(5):321–5. <https://doi.org/10.1080/19490976.2015.1078051> PMID: 26516657
35. Ozutsumi Y, Hayashi H, Sakamoto M, Itabashi H, Benno Y. Culture-independent analysis of fecal microbiota in cattle. *Bioscience, Biotechnology, and Biochemistry* 2005; 69(9):1793–7. <https://doi.org/10.1271/bbb.69.1793> PMID: 16195605



36. Kim M, Kim J, Kuehn LA, Bono JL, Berry ED, Kalchayanand N, et al. Investigation of bacterial diversity in the feces of cattle fed different diets. *Journal of Animal Science*. 2014; 92(2):683–94. <https://doi.org/10.2527/jas.2013-6841> PMID: 24352967
37. Mayer M, Abenthum A, Matthes JM, Kleeberger D, Ege MJ, Holzel C, et al. Development and genetic influence of the rectal bacterial flora of newborn calves. *Veterinary Microbiology*. 2012; 161(1–2):179–85. <https://doi.org/10.1016/j.vetmic.2012.07.023> PMID: 22858232
38. Lim ES, Wang D, Holtz LR. The bacterial microbiome and virome milestones of infant development. *Trends in Microbiology*. 2016; 24(10):801–10. <https://doi.org/10.1016/j.tim.2016.06.001> PMID: 27353648
39. Clemmons BA, Reese ST, Dantas FG, Franco GA, Smith TPL, Adeyosoye OI, et al. Vaginal and uterine bacterial communities in postpartum lactating cows. *Frontiers in Microbiology*. 2017; 8:1047. <https://doi.org/10.3389/fmicb.2017.01047> PMID: 28642755
40. Karstrup CC, Klitgaard K, Jensen TK, Agerholm JS, Pedersen HG. Presence of bacteria in the endometrium and placentomes of pregnant cows. *Theriogenology*. 2017; 99:41–7. <https://doi.org/10.1016/j.theriogenology.2017.05.013> PMID: 28708498
41. Laguardia-Nascimento M, Branco KM, Gasparini MR, Giannattasio-Ferraz S, Leite LR, Araujo FM, et al. Vaginal microbiome characterization of Nellore cattle using metagenomic analysis. *PLoS One*. 2015; 10(11):e0143294. <https://doi.org/10.1371/journal.pone.0143294> PMID: 26599789
42. Jeon SJ, Cunha F, Vieira-Neto A, Bicalho RC, Lima S, Bicalho ML, et al. Blood as a route of transmission of uterine pathogens from the gut to the uterus in cows. *Microbiome*. 2017; 5(1):109. <https://doi.org/10.1186/s40168-017-0328-9> PMID: 28841911
43. Kawamura Y, Fujiwara N, Naka T, Mitani A, Kubota H, Tomida J, et al. Genus *Enhydrobacter* Staley et al. 1987 should be recognized as a member of the family *Rhodospirillaceae* within the class *Alphaproteobacteria*. *Microbiology and Immunology* 2012; 56(1):21–6. <https://doi.org/10.1111/j.1348-0421.2011.00401.x> PMID: 22145860
44. Lima SF, Teixeira AGV, Lima FS, Ganda EK, Higgins CH, Oikonomou G, et al. The bovine colostrum microbiome and its association with clinical mastitis. *Journal of Dairy Science*. 2017; 100(4):3031–42. <https://doi.org/10.3168/jds.2016-11604> PMID: 28161185
45. Drago L, Toscano M, De Grandi R, Grossi E, Padovani EM, Peroni DG. Microbiota network and mathematic microbe mutualism in colostrum and mature milk collected in two different geographic areas: Italy versus Burundi. *The ISME Journal*. 2017; 11(4):875–84. <https://doi.org/10.1038/ismej.2016.183> PMID: 27983720
46. Chen PW, Lin YL, Huang MS. Profiles of commensal and opportunistic bacteria in human milk from healthy donors in Taiwan. *Journal of Food and Drug Analysis*. 2018. <https://doi.org/10.1016/j.jfda.2018.03.004> PMID: 30249322
47. Toscano M, De Grandi R, Grossi E, Drago L. Role of the human breast milk-associated microbiota on the newborns' immune system: A mini review. *Frontiers in Microbiology*. 2017; 8:2100. <https://doi.org/10.3389/fmicb.2017.02100> PMID: 29118752
48. Collado MC, Rautava S, Aakko J, Isolauri E, Salminen S. Human gut colonisation may be initiated in utero by distinct microbial communities in the placenta and amniotic fluid. *Science Reports*. 2016; 6:23129. <https://doi.org/10.1038/srep23129> PMID: 27001291
49. Aldrete-Tapia A, Escobar-Ramirez MC, Tamplin ML, Hernandez-Iturriaga M. High-throughput sequencing of microbial communities in Poro cheese, an artisanal Mexican cheese. *Food Microbiol*. 2014; 44:136–41. <https://doi.org/10.1016/j.fm.2014.05.022> PMID: 25084655
50. Alegria A, Szczesny P, Mayo B, Bardowski J, Kowalczyk M. Biodiversity in Oscypek, a traditional Polish cheese, determined by culture-dependent and -independent approaches. *Applied and Environmental Microbiology*. 2012; 78(6):1890–8. <https://doi.org/10.1128/AEM.06081-11> PMID: 22247135
51. Riquelme C, Camara S, Dapkevicius Mde L, Vinuesa P, da Silva CC, Malcata FX, et al. Characterization of the bacterial biodiversity in Pico cheese (an artisanal Azorean food). *International Journal of Food Microbiology* 2015; 192:86–94. <https://doi.org/10.1016/j.ijfoodmicro.2014.09.031> PMID: 25440551
52. Chase CCL. Enteric immunity: Happy gut, healthy animal. *Veterinary Clinics of North America: Food Animal Practice*. 2018; 34(1):1–18. <https://doi.org/10.1016/j.cvfa.2017.10.006> PMID: 29421027
53. Korpela K, Costea P, Coelho LP, Kandels-Lewis S, Willemsen G, Boomsma DI, et al. Selective maternal seeding and environment shape the human gut microbiome. *Genome Research*. 2018; 28(4):561–8. <https://doi.org/10.1101/gr.233940.117> PMID: 29496731
54. Sakwinska O, Foata F, Berger B, Brussow H, Combremont S, Mercenier A, et al. Does the maternal vaginal microbiota play a role in seeding the microbiota of neonatal gut and nose? *Beneficial Microbes* 2017; 8(5):763–78. <https://doi.org/10.3920/BM2017.0064> PMID: 29022384

55. Ardisson AN, de la Cruz DM, Davis-Richardson AG, Rechcigl KT, Li N, Drew JC, et al. Meconium microbiome analysis identifies bacteria correlated with premature birth. *PLoS One*. 2014; 9(3):e90784. <https://doi.org/10.1371/journal.pone.0090784> PMID: 24614698
56. Aagaard K, Ma J, Antony KM, Ganu R, Petrosino J, Versalovic J. The placenta harbors a unique microbiome. *Science Translational Medicine*. 2014; 6(237):237ra65. <https://doi.org/10.1126/scitranslmed.3008599> PMID: 24848255
57. Martinez KA 2nd, Romano-Keeler J, Zackular JP, Moore DJ, Brucker RM, Hooper C, et al. Bacterial DNA is present in the fetal intestine and overlaps with that in the placenta in mice. *PLoS One*. 2018; 13(5):e0197439. <https://doi.org/10.1371/journal.pone.0197439> PMID: 29771989
